# Supplementary material for: Neuropsychiatric Adverse Drug Reactions with Tyrosine Kinase Inhibitors in Gastrointestinal Stromal Tumors: An Analysis from the European Spontaneous Adverse Event Reporting System
Source: MDPI journal article supplement (doi:10.3390/cancers15061851), 2023-03-20
Supplement: s1 [file s1]

**Table S1.** System Organ Classes, High Level Terms and corresponding Preferred Terms included in the analysis of neuropsychiatric ADRs.

| System Organ Class      | High Level Term                                                   | Preferred Term            |
|-------------------------|-------------------------------------------------------------------|---------------------------|
| Nervous system disorder | Abnormal reflexes                                                 | Areflexia                 |
|                         |                                                                   | Hyporeflexia              |
|                         |                                                                   | Reflexes abnormal         |
|                         | Acute polyneuropathies                                            | Guillain-Barre syndrome   |
|                         | Alzheimer's disease (incl subtypes)                               | Dementia Alzheimer's type |
|                         | Arterial infections and inflammations                             | Giant cell arteritis      |
|                         | Central nervous system aneurysms and dissections                  | Carotid artery aneurysm   |
|                         |                                                                   | Intracranial aneurysm     |
|                         | Central nervous system haemorrhages and cerebrovascular accidents | Brain stem haemorrhage    |
|                         |                                                                   | Cerebellar haemorrhage    |
|                         |                                                                   | Cerebellar infarction     |
|                         |                                                                   | Cerebral artery embolism  |
|                         |                                                                   | Cerebral artery occlusion |
|                         |                                                                   | Cerebral haematoma        |
|                         |                                                                   | Cerebral haemorrhage      |
|                         |                                                                   | Cerebral infarction       |
|                         |                                                                   | Cerebral ischaemia        |
|                         |                                                                   | Cerebral thrombosis       |
|                         |                                                                   | Cerebrovascular accident  |
|                         |                                                                   | Haemorrhage intracranial  |
|                         |                                                                   | Haemorrhagic stroke       |
|                         |                                                                   | Ischaemic stroke          |
|                         |                                                                   | Subarachnoid haemorrhage  |

|                                                   |                                      |
|---------------------------------------------------|--------------------------------------|
|                                                   | Thalamus haemorrhage                 |
| Central nervous system vascular disorders NEC     | Brain hypoxia                        |
|                                                   | Cerebral microangiopathy             |
| Cerebrovascular and spinal vascular disorders NEC | Migraine                             |
| Coma states                                       | Coma                                 |
|                                                   | Coma hepatic                         |
| Coordination and balance disturbances             | Ataxia                               |
|                                                   | Balance disorder                     |
|                                                   | Coordination abnormal                |
|                                                   | Dysstasia                            |
| Cortical dysfunction NEC                          | Nystagmus                            |
|                                                   | Aphasia                              |
|                                                   | Apraxia                              |
|                                                   | Dysgraphia                           |
|                                                   | Visuospatial deficit                 |
| Dementia (excl Alzheimer's type)                  | Dementia                             |
|                                                   | Dementia with Lewy bodies            |
| Demyelinating disorders NEC                       | Demyelination                        |
| Disturbances in consciousness NEC                 | Altered state of consciousness       |
|                                                   | Depressed level of consciousness     |
|                                                   | Lethargy                             |
|                                                   | Loss of consciousness                |
|                                                   | Somnolence                           |
|                                                   | Syncope                              |
| Disturbances in sleep phase rhythm                | Irregular sleep phase                |
|                                                   | Irregular sleep wake rhythm disorder |
| Dyskinesias and movement disorders NEC            | Akathisia                            |

|                                             |                                              |
|---------------------------------------------|----------------------------------------------|
|                                             | Akinesia                                     |
|                                             | Dyskinesia                                   |
|                                             | Hypokinesia                                  |
|                                             | Motor dysfunction                            |
|                                             | Movement disorder                            |
| Dyssomnias                                  | Poor quality sleep                           |
| Encephalopathies NEC                        | Encephalopathy                               |
|                                             | Hypertensive encephalopathy                  |
|                                             | Hypoxic-ischaemic encephalopathy             |
|                                             | Leukoencephalopathy                          |
|                                             | Posterior reversible encephalopathy syndrome |
| Encephalopathies toxic and metabolic        | Hepatic encephalopathy                       |
| Eye movement disorders                      | IIIrd nerve paralysis                        |
|                                             | VIth nerve paralysis                         |
| Facial cranial nerve disorders              | Bell's palsy                                 |
|                                             | Facial nerve disorder                        |
|                                             | Facial paralysis                             |
|                                             | Facial paresis                               |
| Generalised tonic-clonic seizures           | Generalised tonic-clonic seizure             |
| Headaches NEC                               | Headache                                     |
| Hydrocephalic conditions                    | Hydrocephalus                                |
| Increased intracranial pressure disorders   | Brain oedema                                 |
|                                             | Idiopathic intracranial hypertension         |
|                                             | Intracranial pressure increased              |
| Lumbar spinal cord and nerve root disorders | Sciatica                                     |
| Memory loss (excl dementia)                 | Amnesia                                      |

|                                                   |                                      |
|---------------------------------------------------|--------------------------------------|
|                                                   | Memory impairment                    |
|                                                   | Transient global amnesia             |
|                                                   | Cognitive disorder                   |
| Mental impairment (excl dementia and memory loss) | Disturbance in attention             |
|                                                   | Mental impairment                    |
| Mononeuropathies                                  | Carpal tunnel syndrome               |
|                                                   | Nerve compression                    |
| Motor neurone disease                             | Motor neurone disease                |
| Motor neurone diseases                            | Amyotrophic lateral sclerosis        |
| Multiple sclerosis acute and progressive          | Multiple sclerosis                   |
| Muscle tone abnormal                              | Hypertonia                           |
| Muscular autoimmune disorders                     | Myasthenia gravis                    |
|                                                   | Myasthenic syndrome                  |
| Narcolepsy and hypersomnia                        | Hypersomnia                          |
|                                                   | Central nervous system lesion        |
|                                                   | Cerebral disorder                    |
| Nervous system disorders NEC                      | Nervous system disorder              |
|                                                   | Neurotoxicity                        |
|                                                   | Paraneoplastic neurological syndrome |
| Neurologic visual problems NEC                    | Hemianopia homonymous                |
|                                                   | Dizziness                            |
|                                                   | Drooling                             |
| Neurological signs and symptoms NEC               | Head discomfort                      |
|                                                   | Myoclonus                            |
|                                                   | Nervous system disorder              |
|                                                   | Patient elopement                    |

|                                            |                         |
|--------------------------------------------|-------------------------|
|                                            | Presyncope              |
|                                            | Unresponsive to stimuli |
| Neuromuscular disorders NEC                | Muscle spasticity       |
|                                            | Anosmia                 |
| Olfactory nerve disorders                  | Parosmia                |
| Optic nerve disorders NEC                  | Optic neuritis          |
|                                            | Burning sensation       |
|                                            | Dysaesthesia            |
|                                            | Formication             |
| Paraesthesias and dysaesthesias            | Hyperaesthesia          |
|                                            | Hypoaesthesia           |
|                                            | Paraesthesia            |
|                                            | Hemiparesis             |
|                                            | Hemiplegia              |
|                                            | Monoparesis             |
|                                            | Monoplegia              |
| Paralysis and paresis (excl cranial nerve) | Paralysis               |
|                                            | Paraparesis             |
|                                            | Paraplegia              |
|                                            | Paresis                 |
|                                            | Peripheral paralysis    |
|                                            | On and off phenomenon   |
| Parkinson's disease and parkinsonism       | Parkinsonism            |
|                                            | Parkinson's disease     |
|                                            | Axonal neuropathy       |
| Peripheral neuropathies NEC                | Ischaemic neuropathy    |
|                                            | Neuritis                |

|                                          |                                |
|------------------------------------------|--------------------------------|
| Seizures and seizure disorders NEC       | Neuropathy peripheral          |
|                                          | Polyneuropathy                 |
|                                          | Convulsions local              |
|                                          | Epilepsy                       |
| Sensory abnormalities NEC                | Seizure                        |
|                                          | Ageusia                        |
|                                          | Complex regional pain syndrome |
|                                          | Decreased vibratory sense      |
|                                          | Dysgeusia                      |
|                                          | Hypogeusia                     |
|                                          | Neuralgia                      |
|                                          | Restless legs syndrome         |
|                                          | Sensory disturbance            |
|                                          | Sensory loss                   |
|                                          | Taste disorder                 |
|                                          | Vibratory sense increased      |
| Speech and language abnormalities        | Electric shock sensation       |
|                                          | Dysarthria                     |
|                                          | Incoherent                     |
|                                          | Language disorder              |
|                                          | Repetitive speech              |
| Spinal cord and nerve root disorders NEC | Speech disorder                |
|                                          | Myelopathy                     |
|                                          | Spinal cord compression        |
| Structural brain disorders NEC           | Spinal cord disorder           |
|                                          | Brain injury                   |
| Transient cerebrovascular events         | Transient ischaemic attack     |

|                      |                                                        |                                          |
|----------------------|--------------------------------------------------------|------------------------------------------|
| Psychiatric disorder | Tremor (excl congenital)                               | Asterixis                                |
|                      |                                                        | Tremor                                   |
|                      | Vagus nerve disorders                                  | Vocal cord paralysis                     |
|                      | Abnormal behaviour NEC                                 | Abnormal behaviour                       |
|                      |                                                        | Staring                                  |
|                      |                                                        | Agitation                                |
|                      |                                                        | Anxiety                                  |
|                      | Anxiety symptoms                                       | Nervousness                              |
|                      |                                                        | Stress                                   |
|                      |                                                        | Tension                                  |
|                      | Attention deficit and disruptive behaviour disorders   | Attention deficit hyperactivity disorder |
|                      |                                                        | Aggression                               |
|                      | Behaviour and socialisation disturbances               | Paranoia                                 |
|                      |                                                        | Personality change                       |
|                      |                                                        | Daydreaming                              |
|                      | Cognitive and attention disorders and disturbances NEC | Distractibility                          |
|                      |                                                        | Executive dysfunction                    |
|                      | Confusion and disorientation                           | Confusional state                        |
|                      |                                                        | Disorientation                           |
|                      | Deliria                                                | Delirium                                 |
|                      | Delusional symptoms                                    | Delusion                                 |
|                      | Depressive disorders                                   | Depression                               |
|                      | Disturbances in initiating and maintaining sleep       | Insomnia                                 |
|                      | Eating disorders NEC                                   | Anorexia nervosa                         |
|                      |                                                        | Eating disorder                          |
|                      | Emotional and mood disturbances NEC                    | Emotional disorder                       |

|                                                         |                                 |
|---------------------------------------------------------|---------------------------------|
|                                                         | Euphoric mood                   |
|                                                         | Frustration tolerance decreased |
|                                                         | Irritability                    |
|                                                         | Claustrophobia                  |
| Fear symptoms and phobic disorders (incl social phobia) | Fear                            |
|                                                         | Fear of death                   |
| Fluctuating mood symptoms                               | Mood swings                     |
| Hallucinations (excl sleep-related)                     | Hallucination                   |
| Impulse control disorders                               | Pyromania                       |
| Increased physical activity levels                      | Restlessness                    |
| Mental disorders NEC                                    | Mental disorder                 |
|                                                         | Mental status changes           |
|                                                         | Decreased interest              |
| Mood alterations with depressive symptoms               | Depressed mood                  |
|                                                         | Psychomotor retardation         |
|                                                         | Affective disorder              |
| Mood disorders NEC                                      | Apathy                          |
|                                                         | Laziness                        |
|                                                         | Listless                        |
| Panic attacks and disorders                             | Panic attack                    |
|                                                         | Abnormal dreams                 |
| Parasomnias                                             | Sleep talking                   |
|                                                         | Somnambulism                    |
| Perception disturbances NEC                             | Near death experience           |
| Personality disorders NEC                               | Personality disorder            |
| Psychiatric symptoms NEC                                | Abulia                          |
|                                                         | Psychiatric decompensation      |



|                                       |                          |
|---------------------------------------|--------------------------|
| Psychotic disorder NEC                | Psychotic disorder       |
| Schizophrenia NEC                     | Schizophrenia            |
| Sexual desire disorders               | Loss of libido           |
| Sleep disorders NEC                   | Sleep disorder           |
| Somatic symptom disorders             | Illness anxiety disorder |
| Stereotypies and automatisms          | Bruxism                  |
| Suicidal and self-injurious behaviour | Completed suicide        |
|                                       | Suicidal ideation        |
|                                       | Suicide attempt          |
| Thinking disturbances                 | Bradyphrenia             |
|                                       | Thinking abnormal        |
|                                       | Thought blocking         |

**Table S2.** ROR of ICSRs with ADRs by SOC.

| System Organ Class | AVA<br>(n = 1,112) |                         | IM<br>(n = 4,931) |                         | REG<br>(n = 231) |                         | RIP<br>(n = 176) |                            | SU<br>(n = 2,062) |                         | Total<br>(n = 8,512) |
|--------------------|--------------------|-------------------------|-------------------|-------------------------|------------------|-------------------------|------------------|----------------------------|-------------------|-------------------------|----------------------|
|                    | n                  | ROR (95% CI)            | n                 | ROR (95% CI)            | n                | ROR (95% CI)            | n                | ROR (95% CI)               | n                 | ROR (95% CI)            |                      |
| Genrl              | 559                | <b>1.21 (1.06-1.37)</b> | 1,847             | 0.43 (0.40-0.46)        | 78               | 0.59 (0.44-0.78)        | 102              | <b>1.62 (1.18-2.23)</b>    | 1,343             | <b>2.79 (2.52-3.09)</b> | 3,929                |
| Neopl              | 71                 | 0.10 (0.08-0.13)        | 2,042             | <b>1.80 (1.65-1.96)</b> | 57               | 0.58 (0.42-0.79)        | 33               | 0.41 (0.28-0.60)           | 848               | <b>1.35 (1.22-1.49)</b> | 3,051                |
| Gastr              | 404                | <b>1.79 (1.56-2.05)</b> | 1,139             | 0.72 (0.66-0.79)        | 42               | 0.63 (0.45-0.90)        | 46               | 1.02 (0.72-1.45)           | 564               | 1.11 (0.99-1.24)        | 2,195                |
| Skin               | 170                | 1.05 (0.88-1.25)        | 659               | 0.77 (0.69-0.87)        | 80               | <b>3.20 (2.39-4.29)</b> | 36               | <b>1.50 (1.03-2.20)</b>    | 310               | 1.03 (0.90-1.18)        | 1,255                |
| Nerv               | 375                | <b>4.63 (3.99-5.37)</b> | 391               | 0.34 (0.30-0.39)        | 26               | 0.84 (0.55-1.29)        | 30               | 1.38 (0.92-2.08)           | 286               | 1.10 (0.95-1.27)        | 1,108                |
| Blood              | 73                 | 0.47 (0.37-0.60)        | 611               | 1.05 (0.93-1.20)        | 12               | 0.39 (0.22-0.70)        | 4                | NC                         | 335               | <b>1.59 (1.38-1.83)</b> | 1,035                |
| Metab              | 193                | <b>1.73 (1.45-2.06)</b> | 488               | 0.67 (0.59-0.76)        | 26               | 0.96 (0.63-1.46)        | 14               | 0.65 (0.37-1.13)           | 274               | 1.22 (1.05-1.41)        | 995                  |
| Resp               | 108                | 0.99 (0.80-1.23)        | 522               | <b>1.24 (1.08-1.44)</b> | 17               | 0.73 (0.44-1.21)        | 18               | 1.05 (0.64-1.73)           | 168               | 0.77 (0.65-0.92)        | 833                  |
| Inv                | 81                 | 0.90 (0.71-1.15)        | 433               | <b>1.33 (1.13-1.56)</b> | 10               | 0.52 (0.27-0.99)        | 19               | 1.42 (0.87-2.31)           | 132               | 0.74 (0.61-0.91)        | 675                  |
| Inj&P              | 231                | <b>4.84 (4.05-5.80)</b> | 204               | 0.34 (0.28-0.40)        | 20               | 1.23 (0.77-1.98)        | 43               | <b>4.42 (3.07-6.37)</b>    | 113               | 0.69 (0.56-0.86)        | 611                  |
| Musc               | 117                | <b>1.64 (1.33-2.04)</b> | 314               | 0.75 (0.64-0.88)        | 18               | 1.10 (0.67-1.80)        | 26               | <b>2.30 (1.49-3.54)</b>    | 136               | 0.89 (0.73-1.08)        | 611                  |
| Infec              | 76                 | 0.96 (0.74-1.23)        | 348               | 0.99 (0.84-1.17)        | 16               | 0.98 (0.58-1.64)        | 23               | <b>2.01 (1.28-3.17)</b>    | 140               | 0.94 (0.77-1.15)        | 603                  |
| Vasc               | 48                 | 0.61 (0.45-0.83)        | 214               | 0.43 (0.36-0.51)        | 24               | <b>1.70 (1.09-2.63)</b> | 17               | 1.55 (0.93-2.60)           | 251               | <b>2.81 (2.36-3.35)</b> | 554                  |
| Eye                | 168                | <b>3.55 (2.92-4.33)</b> | 305               | 1.03 (0.86-1.23)        | 4                | NC                      | 2                | NC                         | 42                | 0.26 (0.19-0.36)        | 521                  |
| Card               | 23                 | 0.31 (0.21-0.48)        | 283               | 0.99 (0.83-1.19)        | 14               | 1.06 (0.61-1.84)        | 19               | <b>2.02 (1.23-3.31)</b>    | 151               | <b>1.42 (1.17-1.74)</b> | 490                  |
| Hepat              | 40                 | 0.58 (0.41-0.80)        | 311               | <b>1.28 (1.06-1.54)</b> | 33               | <b>2.85 (1.93-4.22)</b> | 5                | 0.47 (0.19-1.16)           | 101               | 0.80 (0.64-1.00)        | 490                  |
| Renal              | 40                 | 0.67 (0.48-0.94)        | 262               | 1.15 (0.95-1.41)        | 12               | 1.04 (0.57-1.88)        | 6                | 0.66 (0.29-1.51)           | 108               | 1.06 (0.85-1.32)        | 428                  |
| Psych              | 182                | <b>6.36 (5.15-7.84)</b> | 137               | 0.36 (0.29-0.44)        | 4                | NC                      | 9                | 1.09 (0.55-2.15)           | 71                | 0.66 (0.51-0.85)        | 403                  |
| Surg               | 53                 | <b>1.81 (1.33-2.47)</b> | 136               | 0.85 (0.66-1.09)        | 3                | NC                      | 60               | <b>21.94 (15.39-31.27)</b> | 0                 | -                       | 252                  |
| Endo               | 7                  | 0.47 (0.22-1.02)        | 28                | 0.26 (0.17-0.40)        | 6                | 2.20 (0.95-5.10)        | 1                | NC                         | 63                | <b>4.81 (3.24-7.13)</b> | 105                  |
| Immun              | 31                 | <b>3.45 (2.23-5.35)</b> | 43                | 0.63 (0.42-0.96)        | 1                | NC                      | 1                | NC                         | 16                | 0.66 (0.38-1.13)        | 92                   |
| Ear                | 15                 | 1.62 (0.92-2.86)        | 45                | 1.02 (0.65-1.61)        | 1                | NC                      | 0                | -                          | 16                | 0.82 (0.47-1.42)        | 77                   |
| Repro              | 2                  | 0.22 (0.05-0.89)        | 44                | 1.69 (0.98-2.89)        | 1                | NC                      | 1                | NC                         | 15                | 0.98 (0.55-1.75)        | 63                   |

|       |   |                         |    |                  |   |    |   |    |   |                  |    |
|-------|---|-------------------------|----|------------------|---|----|---|----|---|------------------|----|
| Cong  | 0 | -                       | 23 | NC               | 0 | -  | 0 | -  | 1 | NC               | 24 |
| SocCi | 7 | <b>2.75 (1.14-6.65)</b> | 6  | 0.24 (0.10-0.61) | 2 | NC | 3 | NC | 6 | 1.04 (0.41-2.63) | 24 |
| Prod  | 5 | 2.57 (0.91-7.22)        | 12 | 1.45 (0.55-3.88) | 0 | -  | 0 | -  | 1 | NC               | 18 |
| Preg  | 0 | -                       | 5  | NC               | 0 | -  | 0 | -  | 0 | -                | 5  |

Significant RORs are in bold type. NC, not calculated because there were fewer than five reports or there were reports only for one drug. ADR, adverse drug reactions; AVA, avapritinib; Blood, blood and lymphatic system disorders; Card, cardiac disorders; CI, confidence interval; Cong, congenital, familial and genetic disorders; Ear, ear and labyrinth disorders; Endo, Endocrine disorders; Eye, eye disorders; Gastr, gastrointestinal disorders; Genrl, general disorders and administration site conditions; Hepat, hepatobiliary disorders; ICSR, Individual Case Safety Report; IM, imatinib; Immun, immune system disorders; Infec, infections and infestations; Inj&P, injury, poisoning and procedural complications; Inv, investigations; Metab, metabolism and nutrition disorders; Musc, musculoskeletal and connective tissue disorders; Neopl, neoplasms benign, malignant and unspecified (incl cysts and polyps); Nerv, nervous system disorders; Preg, pregnancy, puerperium and perinatal conditions; Prod, product issues; Psych, psychiatric disorders; REG, regorafenib; Renal, renal and urinary disorders; ROR, reporting odds ratio; Repro, Reproductive system and breast disorders; Resp, respiratory, thoracic and mediastinal disorders; RIP, ripretinib; Skin, skin and subcutaneous tissue disorders; SocCi, social circumstances; SU, sunitinib; Surg, surgical and medical procedures; SOC, System Organ Class; Vasc, vascular disorders.
